# Supplementary material
Source: PubMed Central journal article supplement (PMC5055460)
Supplement: NIHMS810604-supplement-1.pdf [file NIHMS810604-supplement-1.pdf]

Figure S1

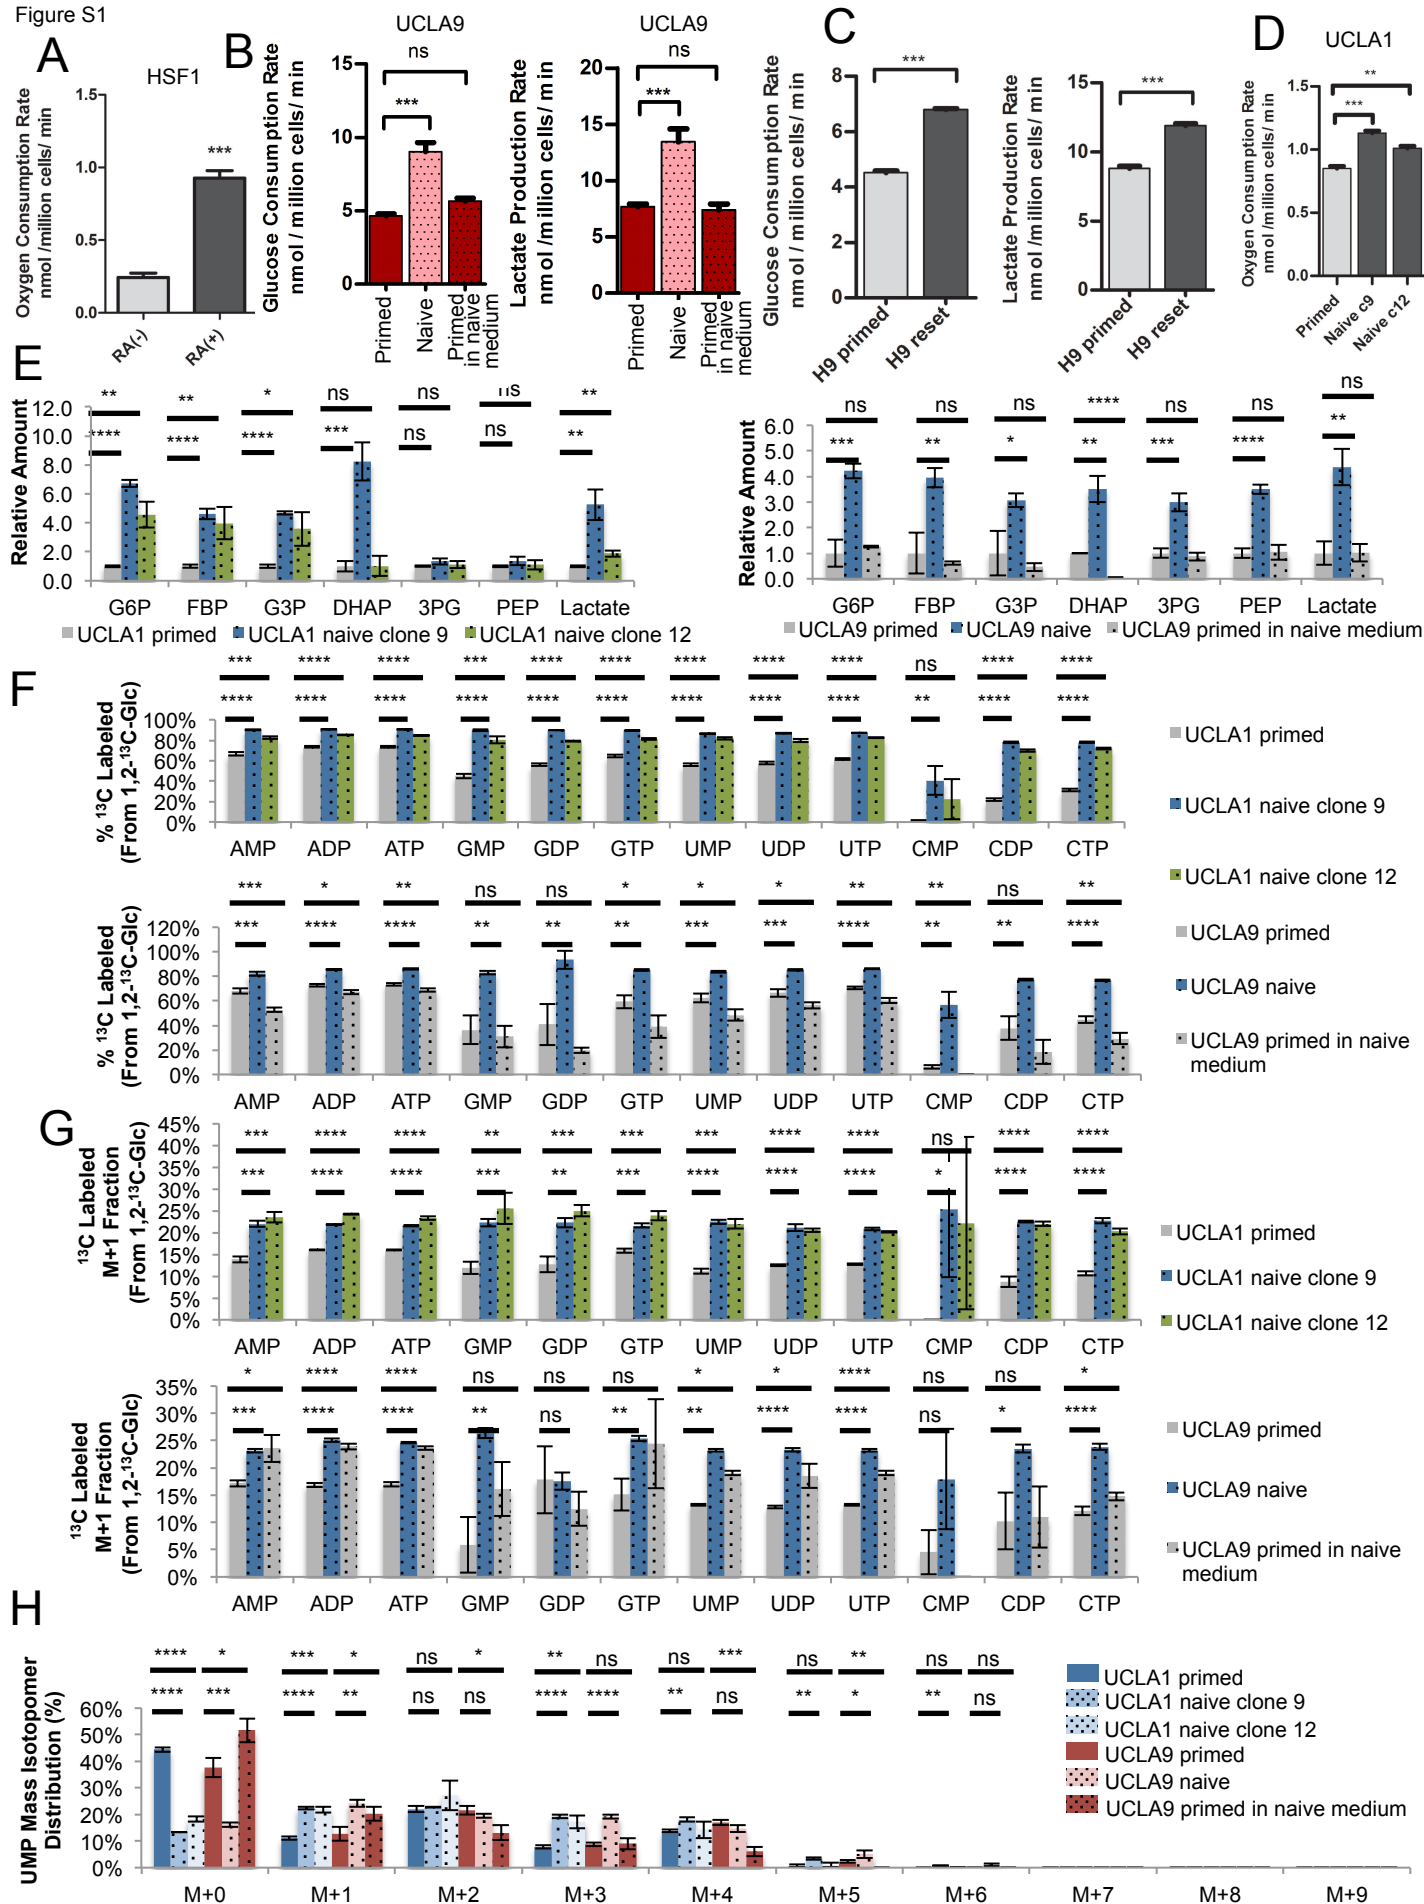

Figure S2

MENSSEN\_MYC\_TARGETS

URL: [http://software.broadinstitute.org/gsea/msigdb/cards/MENSSEN\\_MYC\\_TARGETS](http://software.broadinstitute.org/gsea/msigdb/cards/MENSSEN_MYC_TARGETS)

A

> Genes up-regulated by adenoviral expression of c-MYC [GeneID=4609] in HUVEC cells (umbilical vein endothelium).

|        |          |          |        |        |
|--------|----------|----------|--------|--------|
| APEX1  | EIF5AL1  | HSPD1    | MSH2   | RPS19  |
| BRCA1  | ENO1     | HSPB1    | NCL    | RRP9   |
| C1QBP  | EPRS     | HSPH1    | NME1   | RUVBL2 |
| CCNB1  | FKBP4    | KAT2B    | NOP56  | SCARB1 |
| CCT3   | HERC5    | KIAA0664 | NPM1   | SLP1   |
| CDK4   | HNRPDL   | LDHA     | NSF    | SRM    |
| DDX21  | HSP90AA1 | LDHB     | NUTF2  | TRAP1  |
| DNAJB1 | HSP90AB1 | METAP2   | PFKM   | TSPO   |
| EFTUD2 | HSPA1A   | MGST1    | PHB    | YWHAE  |
| EI24   | HSPA8    | MNT      | POLR2F |        |
| EIF3B  | HSPA9    | MRPL3    | PPIF   |        |

B UCLA1 naive c9 versus primed hESCs C UCLA1 naive c12 versus primed hESCs D Takashima et al. H9 reset versus primed hESCs

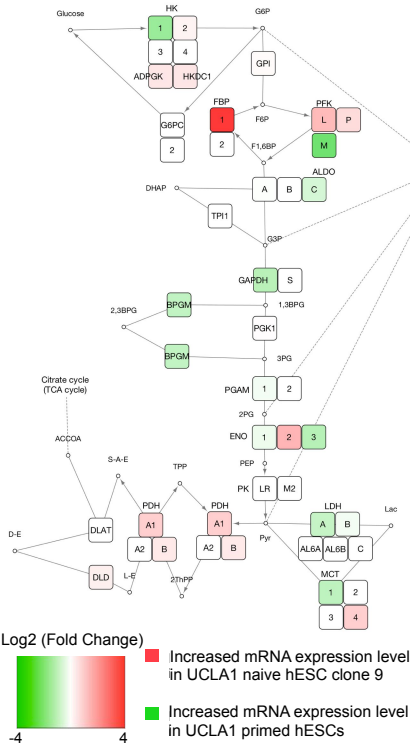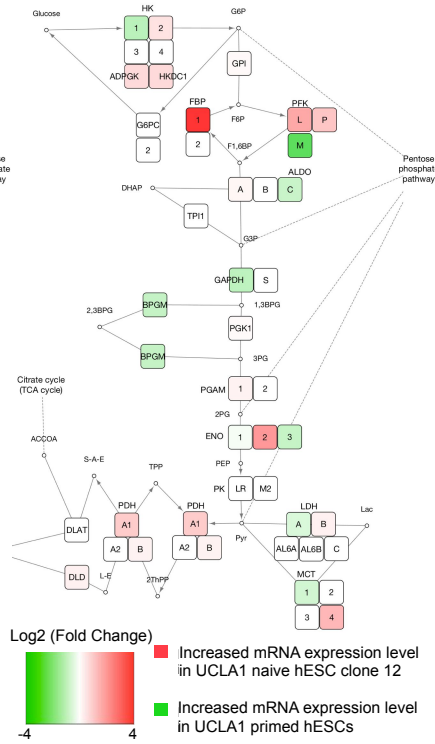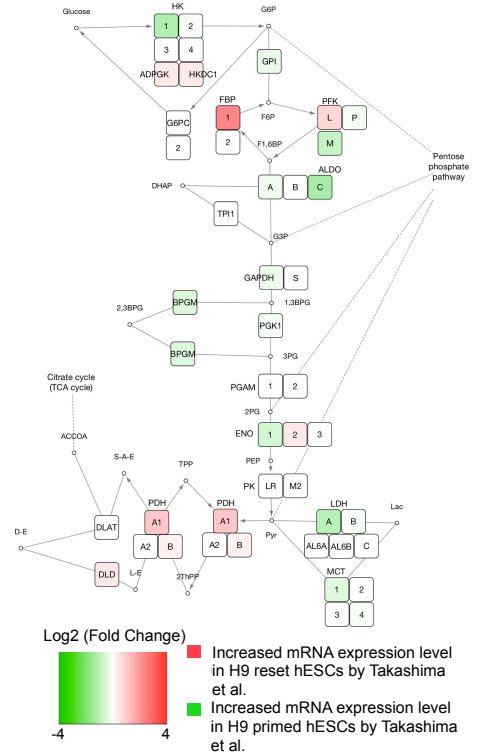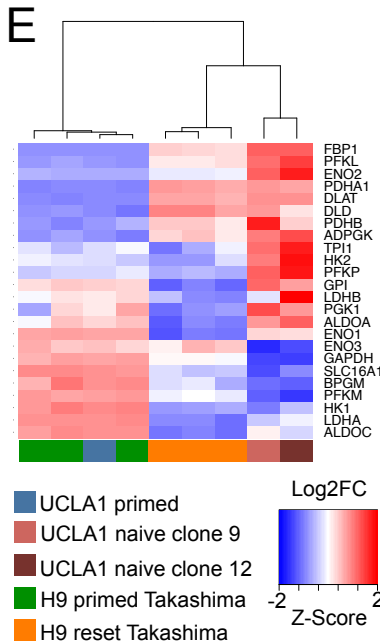

F

|                 | Oocyte | 2-cell | 4-cell | 6-cell | 8 to 10-cell | Morula | Blastocyst | ESC  |
|-----------------|--------|--------|--------|--------|--------------|--------|------------|------|
| Oocyte vs       | -      | N.E.   | 0.77   | N.E.   | N.E.         | N.E.   | N.E.       | N.E. |
| 2-cell vs       | 0.89   | -      | 1.52   | N.E.   | N.E.         | N.E.   | N.E.       | N.E. |
| 4-cell vs       | N.E.   | N.E.   | -      | N.E.   | N.E.         | N.E.   | N.E.       | N.E. |
| 6-cell vs       | 1.33   | 1.07   | 1.72   | -      | N.E.         | N.E.   | N.E.       | N.E. |
| 8 to 10-cell vs | 2.64   | 2.59   | 2.24   | 2.47   | -            | N.E.   | N.E.       | 1.2  |
| Morula vs       | 1.92   | 1.91   | 2.44   | 2.51   | 0.97         | -      | 1.11       | 1.78 |
| Blastocyst vs   | 2.29   | 2.01   | 2.13   | 2.58   | 0.98         | N.E.   | -          | 1.57 |
| ESC vs          | 2.22   | 2.32   | 2.23   | 2.15   | N.E.         | N.E.   | N.E.       | -    |

N.E. = Not enriched

Normalized enrichment score

0.5 4.0

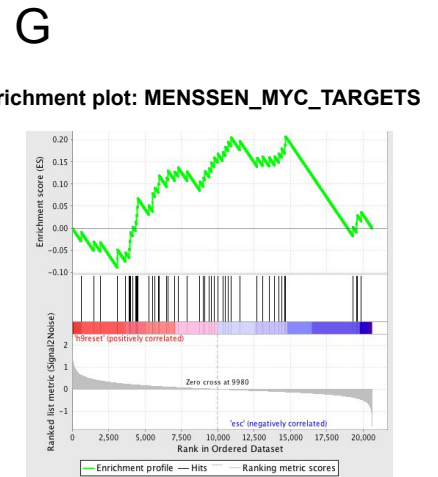

Figure S3

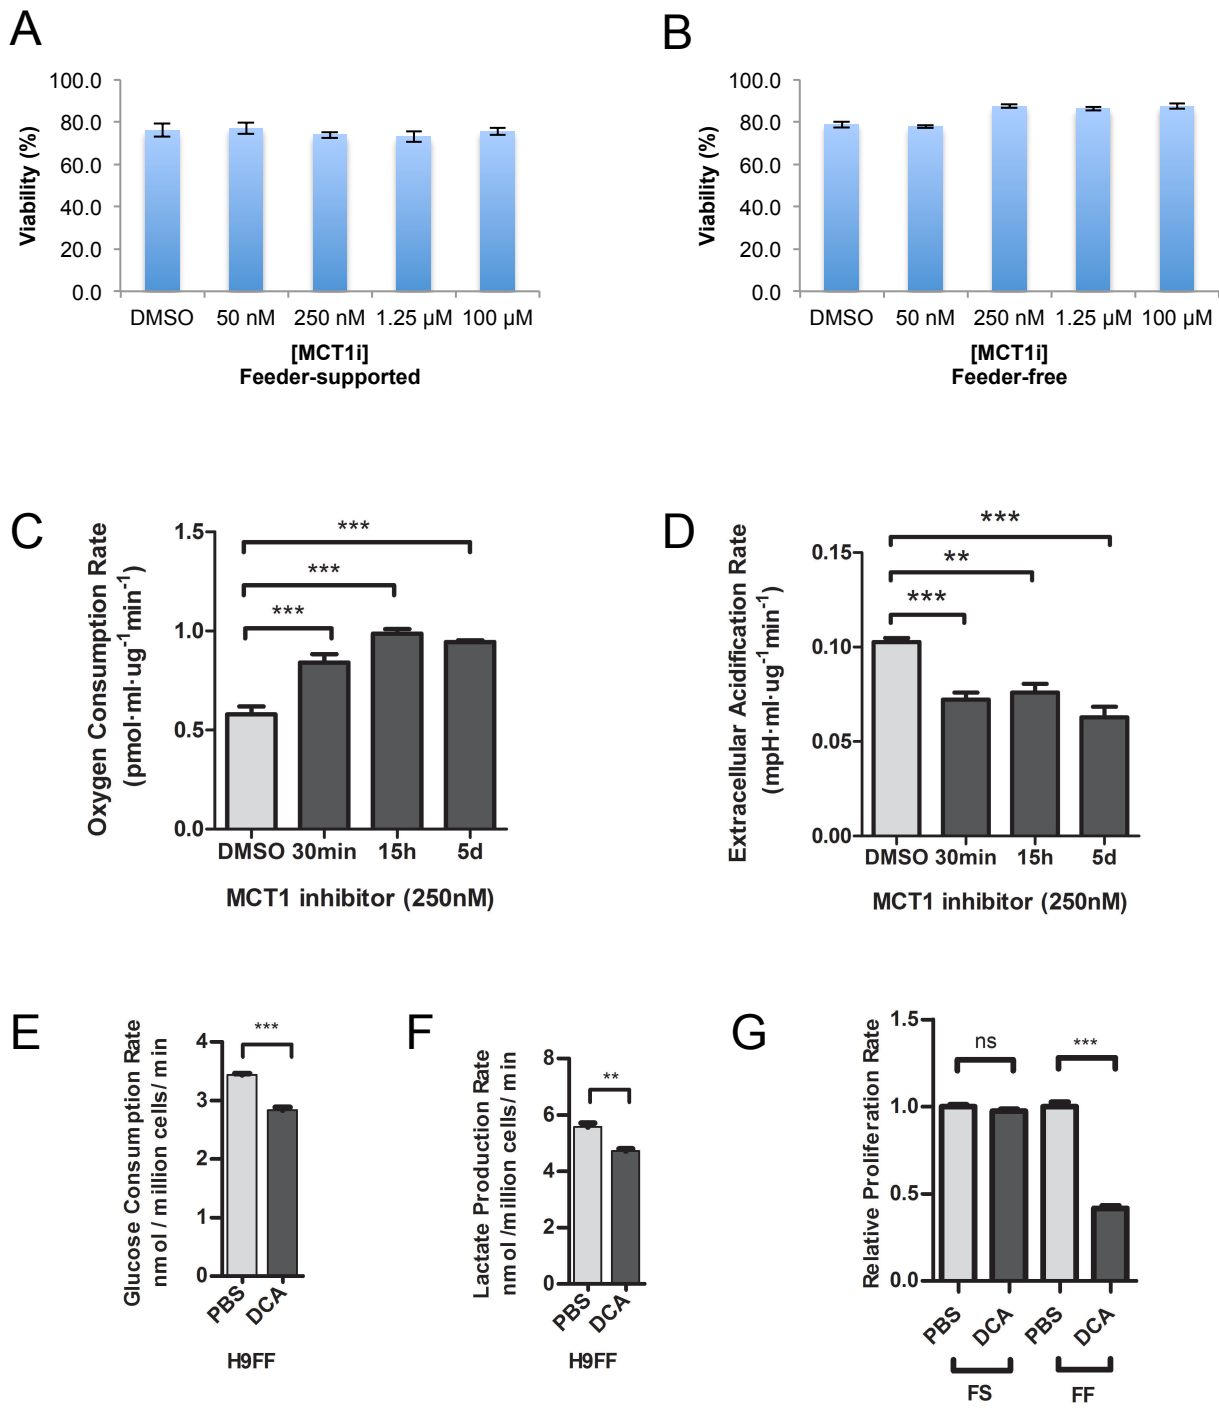

Figure S4

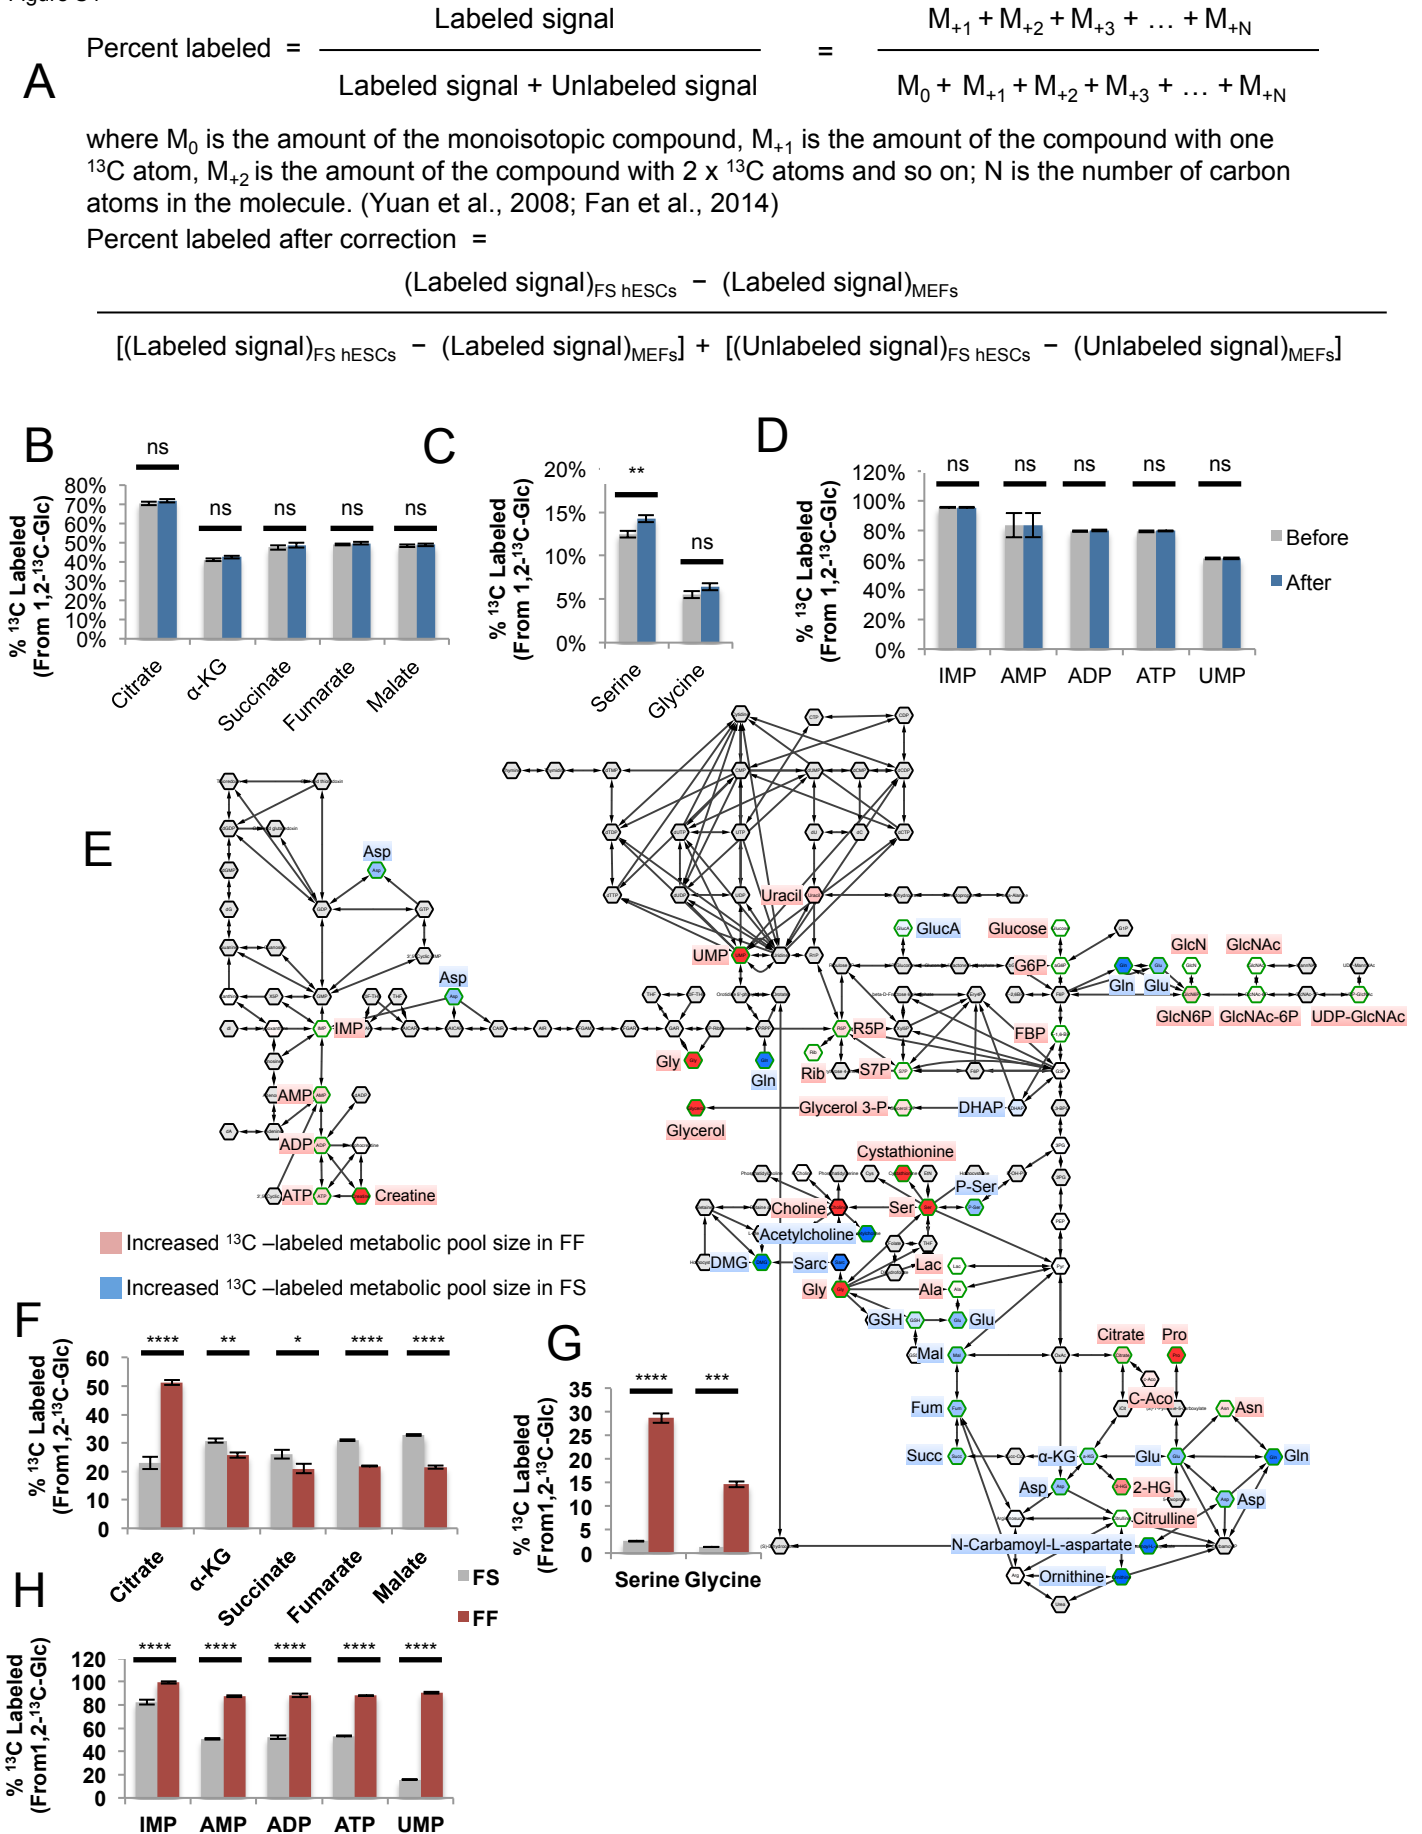

Figure S5

A

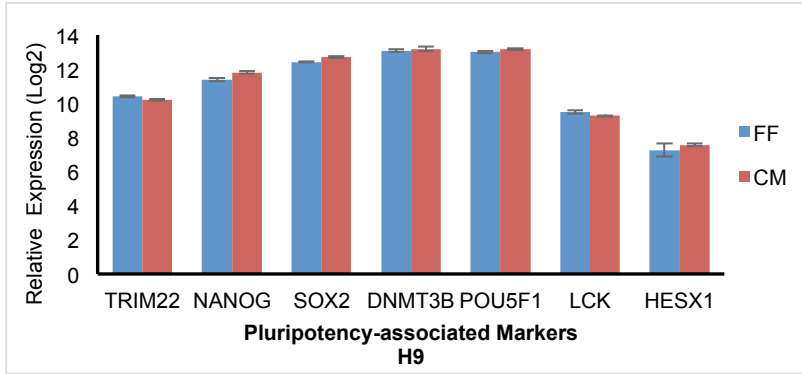

B

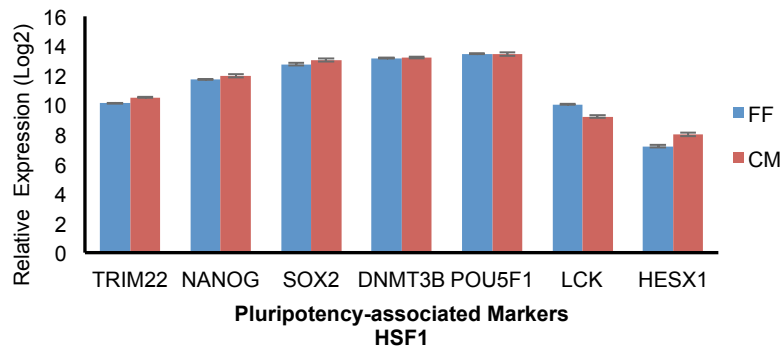

Figure S6

A

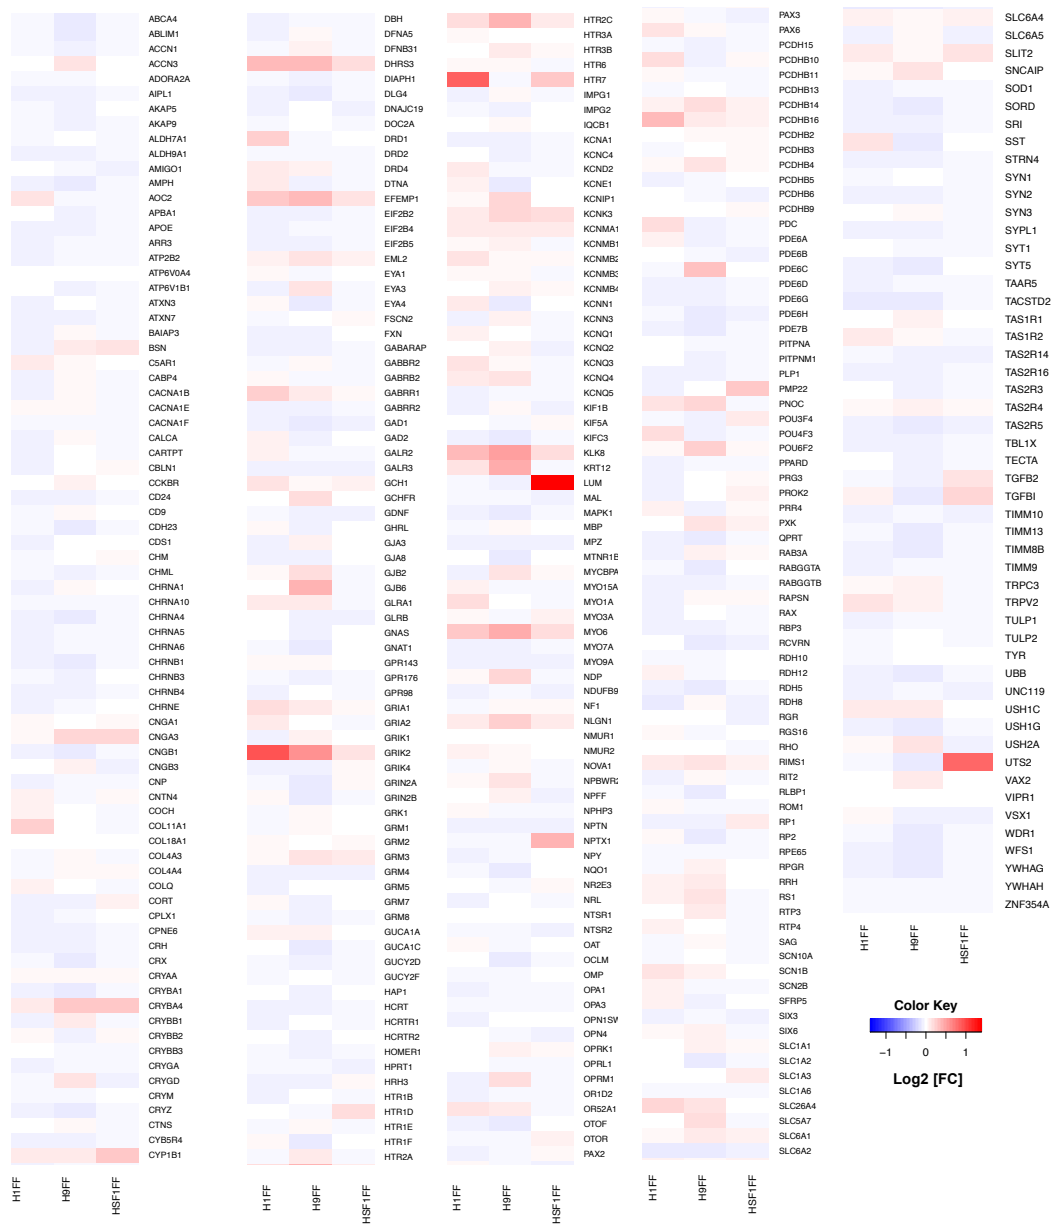

B

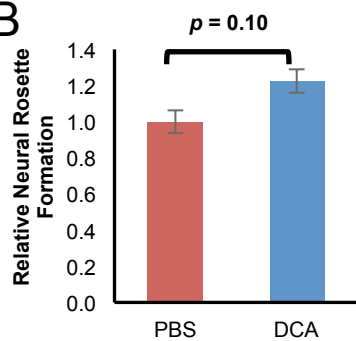

Figure S7

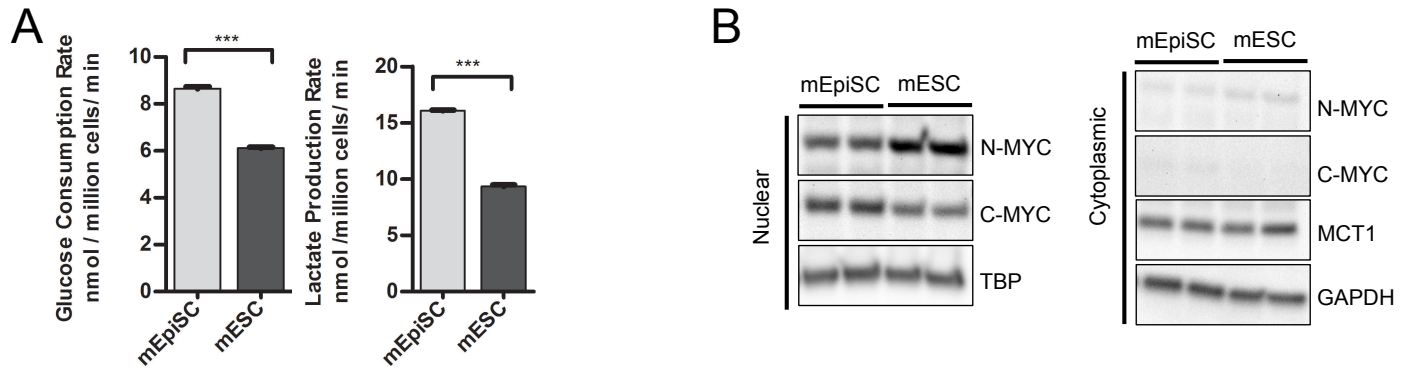

## SUPPLEMENTAL FIGURE AND TABLE LEGENDS

### Figure S1. Related to Figure 1. Naive hESCs exhibit increased glycolysis. (A)

Oxygen consumption rates in FS HSF1 hESCs, treated for 7 days with DMSO (RA (-)) or 10  $\mu$ M retinoic acid (RA (+)), as measured by an anaerobic chamber fitted with a fiber optic oxygen sensor. (B) Glucose consumption and lactate production rates of primed UCLA9 hESCs, naive UCLA9 hESCs generated by the 5i/LAF method, and primed UCLA9 hESCs placed in naive cell medium for 24 hours. (C) Glucose consumption rates (left) and lactate production rates (right) of primed H9 hESCs and naive/reset H9 hESCs generated by the Takashima et al. method (Takashima et al., 2014). (D) Oxygen consumption rates of primed UCLA1 hESCs and naive UCLA1 hESC clone 9 and clone 12 generated by the 5i/LAF method. For (E) – (H), primed UCLA1 hESCs, naive UCLA1 hESC clone 9 and clone 12, and primed UCLA9 hESCs, naive UCLA9 hESC, and primed UCLA9 hESCs placed in naive cell medium, were cultured in medium containing 1,2-<sup>13</sup>C-glucose for 24 hours prior to metabolite extraction and analysis by LC-MS. (E) Relative amounts of indicated glycolytic intermediates extracted from the indicated cells. (F) Percentages of the indicated <sup>13</sup>C-labeled nucleotides extracted from the indicated cells. (G) Percentages of the indicated <sup>13</sup>C-labeled M+1 form of nucleotides extracted from the indicated cells. (H) Mass isotopomer distribution of the indicated <sup>13</sup>C-labeled UMP extracted from the indicated cells. For (A) - (H), error bars indicate  $\pm$  1 SEM of biological replicates (n = 3). ns: not significant; \* p < 0.05; \*\* p < 0.01; \*\*\* p < 0.001; \*\*\*\* p < 0.0001.



**Figure S2. Related to Figure 2. Glycolysis pathway gene expression changes upon the acquisition of naive pluripotency.** (A) Members of the MYC target gene set by Menssen et al. Cytoscape network map showing the fold change of KEGG glycolysis genes in naive UCLA1 hESC clone 9 versus primed UCLA1 hESCs (B), naive UCLA1 hESC clone 12 versus primed UCLA1 hESCs (C), and Takashima reset versus primed H9 hESCs (D). Genes in red indicate increased mRNA expression levels in naive or reset cells. Genes in green indicate increased mRNA expression levels in primed cells. (E) Heatmap depicting log<sub>2</sub> fold changes of KEGG glycolysis genes across UCLA1 primed, UCLA1 naive clone 9 and clone 12, and Takashima reset and primed H9 hESCs. Bottom colored bars indicate sample origins. (F) Heatmap showing the enrichment of MYC-regulated genes across various early human embryo development stages from Vassena et al. dataset. Each cell contains the normalized enrichment score (NES), based on GSEA, from pairwise comparison of two different cell types, as indicated. N.E.: not enriched. (G) GSEA mountain plot displaying enrichment of MYC-regulated genes in H9 reset versus primed hESCs.

**Figure S3. Related to Figure 3. Manipulation of hESC metabolism via MCT1 inhibition.** Cell viabilities of feeder-supported (A) and feeder-free (B) primed H9 hESCs treated with DMSO or AZD3965 at indicated concentrations for 24 hours, as determined by Trypan Blue staining. Oxygen consumption rates (C) and extracellular acidification rates (D) in FF H9 hESCs, treated with DMSO or 250 nM AZD3965 for the indicated times, as measured by XF24 Extracellular Flux Analyzer. Glucose consumption rates (E) and lactate production rates (F) of FF primed H9 hESCs treated with PBS or 5 mM

dichloroacetic acid (DCA) for 24 hours. (G) Proliferation rates of feeder-supported (FS) versus feeder-free (FF) H9 hESCs treated with PBS or 5 mM dichloroacetic acid (DCA) for 5 days. For (A) – (G), error bars indicate  $\pm 1$  SEM of biological replicates ( $n = 3$ ). ns: not significant; \*\*  $p < 0.01$ , \*\*\*  $p < 0.001$ .

**Figure S4. Related to Figure 4. Feeder-free Cultured hESCs Exhibit Increased**

**Anabolic Glucose Metabolism Relative to Feeder Supported hESCs.** (A) The formulas applied to calculate the effect of MEFs on the  $^{13}\text{C}$  glucose labeling pattern of feeder supported hESCs. (B) Incorporation of  $^{13}\text{C}$  labeled glucose into TCA cycle metabolites, and (C) serine and glycine, and (D) nucleotides in feeder supported UCLA1 hESCs before and after the mathematical correction. Feeder supported UCLA1 hESCs and MEFs alone were cultured in medium with  $1,2\text{-}^{13}\text{C}$ -glucose for 24 hours. Extracted metabolites were analyzed by LC-MS, and the percentage of  $^{13}\text{C}$ -labeled metabolites was compared. (E) Cytoscape network map showing differential use of glucose in many metabolic pathways in FS versus FF H1 hESCs. Metabolites in red indicate increased incorporation of  $1,2\text{-}^{13}\text{C}$ -glucose carbons in FF hESCs compared to FS hESCs. Metabolites in blue indicate increased incorporation of  $1,2\text{-}^{13}\text{C}$ -glucose carbons in FS hESCs compared to FF hESCs. Green borders indicate where the changes in incorporation of  $1,2\text{-}^{13}\text{C}$ -glucose in FS hESCs compared to FF hESCs are statistically significant ( $p < 0.05$ ). Metabolites in white indicate similar incorporation of  $1,2\text{-}^{13}\text{C}$ -glucose carbons in FS hESCs compared to FF hESCs. Metabolites in grey are undetected. (F) Percentages of the indicated  $^{13}\text{C}$ -labeled TCA cycle metabolites in FS versus FF H1 hESCs. (G) Percentages of  $^{13}\text{C}$ -labeled serine and glycine in FS versus FF H1 hESCs.

(H) Percentages of  $^{13}\text{C}$ -labeled nucleotides in FS versus FF H1 hESCs. For (B) – (D) and (F) – (H), error bars indicate  $\pm 1$  SEM of biological replicates ( $n = 3$ ). ns: not significant; \*  $p < 0.05$ ; \*\*  $p < 0.01$ ; \*\*\*  $p < 0.001$ ; \*\*\*\*  $p < 0.0001$ .

**Figure S5. Related to Figure 5. MEF-conditioned medium treatment does not change pluripotency-associated transcripts in primed feeder-free hESCs.** mRNA levels of TRIM22, NANOG, SOX2, DNMT3B, POU5F1, LCK, and HESX1 in feeder-free (FF) versus MEF-conditioned medium treated FF (CM) H9 (A) and HSF1 (B) primed hESCs. Error bars indicate  $\pm 1$  SD of biological replicates ( $n=3$ ).

**Figure S6. Related to Figure 7. MCT1 inhibition of feeder free-cultured primed hESCs promotes neural lineage specification.** (A) Heatmap representation of the relative fold changes (base 2) of the genes from the gene ontology term “neurological system process” after five days AZD3965 versus DMSO treatment of primed feeder-free H9, H1, and HSF1 hESCs. (B) Neural rosette formation efficiency of primed feeder-free hESCs treated with rosette formation media supplemented with PBS or 5 mM dichloroacetic acid (DCA) for 10 days. The number of rosette structures was quantified. Error bars indicate  $\pm 1$  SEM of biological replicates ( $n = 3$ ).

**Figure S7. Mouse embryonic stem cells exhibit lower glycolytic rates compared to mouse epiblast stem cells.** (A) Glucose consumption rates (left) and lactate production rates (right) of mEpiSCs derived from in vivo epiblast and mESCs cultured in 2i/LIF condition. Error bars indicate  $\pm 1$  SEM of biological replicates ( $n = 3$ ). \*\*\*  $p < 0.001$ .

(B) Immunoblot showing nuclear and cytoplasmic N-MYC and C-MYC levels in mEpiSCs derived from *in vivo* epiblast and mESCs cultured in 2i/LIF condition. Cytoplasmic MCT1 levels are also shown. TBP is used a loading control for the nuclear lysates. GAPDH is used as a loading control for the cytoplasmic lysates. Lysates were prepared in biological duplicates.

**Table S1. Related to Figure 7. Input list of ranked genes for GO analysis by GOrilla.**

## **SUPPLEMENTAL EXPERIMENTAL PROCEDURES**

### **Cell Culture**

Conventional feeder-supported human ESC lines H1, H9 (WiCell Research Institute, Inc., Madison, WI), HSF1 (University of California San Francisco, San Francisco, CA), UCLA1, and UCLA9 (University of California Los Angeles, Los Angeles, CA) were maintained on radiation inactivated MEF feeder layers (GlobalStem) and passed enzymatically by treatment for 2 min with 1 mg/ml Collagenase type IV (STEMCELL Technologies), and then mechanically lifted by using a cell scraper (Falcon), followed by passing through a 100- $\mu$ m cell strainer. Conventional feeder-supported human ESCs were cultured in human ESC medium (hESM) – DMEM/F12 (Invitrogen) supplemented with 20% KSR (Invitrogen), 1% nonessential amino acids (NEAA, Invitrogen), 0.1 mM  $\beta$ -mercaptoethanol (Invitrogen), and 10 ng/ml FGF2 (Peprotech). Primed feeder-free human ESC lines H1, H9, and HSF1 were cultured on plates pre-coated with 1:25 diluted Matrigel (BD Biosciences) in mTeSR1 medium (STEMCELL Technologies). Tissue culture media were filtered using a low protein-binding 0.22  $\mu$ m filter (Millipore). All experiments were performed under 5% CO<sub>2</sub> and atmospheric oxygen levels.

Naive human pluripotent stem cells were generated and maintained using the 5i/LAF condition exactly as described (Theunissen et al., 2014). Briefly, feeder-supported UCLA1 and UCLA9 hESCs were grown to ~ 60% density and fed hESM supplemented with 10  $\mu$ M ROCK inhibitor Y-27632 (Stemgent). The following day, hESCs were trypsinized to single cell (0.05% Trypsin, ThermoFisher Scientific) and plated on feeders at  $2 \times 10^5$  cells/well of a 6-well dish in hESM with ROCKi. Two days later culture medium was switched to 5i/LAF (1  $\mu$ M PD0325901, 10  $\mu$ M Y-27632 (Stemgent), 1  $\mu$ M

IM-12 (Enzo), 0.5  $\mu$ M SB590885 (R&D), 1  $\mu$ M WH-4-023 (A Chemtek), 20 ng/ml recombinant hLIF (Millipore), 20 ng/ml Activin A (Peprotech), and 8 ng/ml FGF2 (R&D) in a 1:1 mixture of DMEM/F12 and Neurobasal medium (Invitrogen) supplemented with 1x N2, B27, NEAA, Pen/Strep, Glutamine (Invitrogen), 0.1 mM beta-mercaptoethanol, 0.5% KSR and 50  $\mu$ g/ml BSA). Medium was changed daily, and in 8-10 days, after massive cell death, several dome-shaped colonies appeared. These colonies were passaged using Accutase (ThermoFisher Scientific). After 3-4 passages naive hESCs had expanded enough to be split at 1:4 or 1:5 ratio every 5 days. Before plating cells were passed through 40- $\mu$ m mesh since naive hESCs grow best when plated as single cells. Feeder-supported naive line UCLA19 was derived directly from the inner cell mass of a human blastocyst and since cultured in 5i/LAF medium.

Another naive human pluripotent stem cell line, H9 reset, was maintained using the Takashima et al. method exactly as described (Takashima et al., 2014), and cultured in an incubator with 5% O<sub>2</sub> and 5% CO<sub>2</sub> at 37 °C. For comparing the glycolytic rates in reset versus primed H9 hESCs, both reset and primed cells were received from the Austin Smith Lab and cultured under 5% O<sub>2</sub> condition.

Neural rosette differentiation was induced by treatment with DMEM/F12 supplemented with B27 and N2 (Gibco), 1  $\mu$ M retinoic acid (Sigma), 20 ng/ml FGF2, and 1  $\mu$ M purmorphamine (Cayman chemical) for 10 days.

Cells were treated with AZD3965 (AstraZeneca, 250 nM) or CD532 (Millipore, 25 – 250 nM) for indicated times to assess the effects of MCT1 inhibition or N-MYC inhibition.

### **Immunostaining of Human Preimplantation Embryos**

All experiments were performed using human embryos that were excess to infertility treatment and donated for research following informed consent in accordance with the guidelines established by UCLA Embryonic Stem Cell Research Oversight (ESCRO) Committee and the Committee on the Use of Human Subjects Institutional Review Board (IRB).

Human blastocysts were thawed using Vit Kit-Thaw (Irvine Scientific) according to manufacturer protocol. The embryos were cultured in drops of Continuous Single Culture medium (Irvine Scientific) supplemented with 20% Quinn's Advantage SPS Serum Protein Substitute (Sage Media) under mineral oil (Irvine Scientific) overnight at 37 °C, 6% CO<sub>2</sub> and 5% O<sub>2</sub>. Embryos were fixed at room temperature in 4% paraformaldehyde for 30 minutes, and then washed several times in 0.1% Tween-20 in PBS. Embryos were permeabilized in 1% Tween-20 in PBS at 4 °C for 4 days on a rotating shaker and then blocked in 10% FBS and 0.2% Tween-20 in PBS at room temperature for 1 hour. Embryos were incubated in a 1:100 dilution of primary antibody in blocking buffer at 4°C overnight on a rotating shaker and washed several times in 0.1% Tween-20 in PBS at room temperature. Embryos were incubated in a 1:500 dilution of secondary antibody anti-rabbit Alexa Fluor 555 (Invitrogen) in blocking buffer at room temperature for 1 hour while protected from light. They were then washed several times in 0.1% Tween-20 in PBS and mounted in ProLong Diamond with DAPI (Invitrogen) on a glass slide, covered with a glass coverslip and left at room temperature to cure overnight. Images were taken using a LSM780 confocal microscope (Zeiss).

### **Glucose Consumption and Lactate Production Rates**

Cellular glucose consumption and lactate export rates were measured using a Nova Biomedical BioProfile Basic Analyzer. Briefly, cells were seeded in triplicates in 6-well plates at usual passing density. Ninety-six hours post-seeding, when the colonies were subconfluent, cells were washed with PBS, and 1ml fresh medium was added to each well, including an empty well without any cells as a blank control. After 24-hour incubation, culture medium was collected and then analyzed by the Nova BioProfile analyzer. Cell numbers were determined both before and after the 24-hour incubation period using a Coulter particle analyzer and used to normalize the calculated rates. Among different figures, the same cell line might show different values in glucose and lactate readings, which was due to the difference in cell numbers between different experiments. Since plating density of cells can impact metabolism, we always ensured that different treatment groups or cell lines within a given experiment had similar cell counts when glucose and lactate measurements were taken. We accomplished this by plating hESCs at different densities and measuring the media glucose and lactate amounts in the ones with similar cell counts.

### **Oxygen Consumption Rates**

For comparing oxygen consumption rates in feeder-supported hESCs, cells were treated with Accutase (Invitrogen) for 5 minutes after PBS wash, passed through a 40- $\mu$ m cell strainer (BD), and cell count was obtained. Four million cells were spun down at 300g for 5 minutes, resuspended in 250  $\mu$ l culture medium, and transferred to an anaerobic chamber of 250  $\mu$ l volume. The anaerobic chamber was maintained at 37 °C by a water circulating system (DC10, Thermo), and fitted with a fiber optic oxygen sensor (Model 110, INSTECH). Oxygen concentration was sensed by the quenching of fluorescence of



an indicator dye trapped in a matrix at the tip of the probe, and was calibrated with 15 mM sodium hydrosulfite (Sigma) and cell culture media, corresponding to 0% and 20.9% oxygen respectively.

### **Extracellular Acidification and Oxygen Consumption Rates**

For comparing extracellular acidification and oxygen consumption rates in feeder-free primed hESCs, with AZD3965 or DMSO treatment, cells were seeded onto an XF24 Cell Culture Microplate (Seahorse Bioscience) at  $2 - 7.5 \times 10^4$  cells/well with the 10  $\mu$ M ROCK inhibitor Y-27632 (Calbiochem) and incubated at 37°C overnight. Extracellular acidification and oxygen consumption rates were measured by using an XF24 Extracellular Flux Analyzer (Seahorse Bioscience) in unbuffered DMEM assay medium supplemented with 1mM pyruvate and 25mM glucose after 45 to 60-minute equilibration, and were normalized to protein concentration using the Protein Assay reagent (Bio-Rad).

### **Mass Spectrometry-based Metabolomics Analysis**

Cells were incubated in medium containing 3.151 g/l 1,2-<sup>13</sup>C-glucose for 24 hours. The following day, cells were rinsed with cold 150 mM ammonium acetate (NH<sub>4</sub>AcO). Cells were carefully scraped off in 800  $\mu$ l of 50% ice cold methanol. An internal standard of 12.5  $\mu$ M norvaline was added to the cell suspension, followed by 400  $\mu$ l of cold chloroform. After vortexing for 15 min, the aqueous layer was transferred to a glass vial and the metabolites were dried under vacuum. Metabolites were resuspended in 100  $\mu$ l 70% acetonitrile (ACN) and 5  $\mu$ l of this solution was used for the mass spectrometer-based analysis. The analysis was performed on a Q Exactive (Thermo Scientific) in polarity-switching mode with positive voltage 3.0 kV and negative voltage 2.25 kV. The mass spectrometer was coupled to an UltiMate 3000RSLC (Thermo Scientific) UHPLC

system. Mobile phase A was 5 mM NH<sub>4</sub>AcO, pH 9.9, B was ACN, and the separation achieved on a Luna 3mm NH<sub>2</sub> 100A (150 x 2.0 mm) (Phenomenex) column. The flow was 300 µl/min, and the gradient ran from 15% A to 95% A in 18 min, followed by an isocratic step for 9 minutes and re-equilibration for 7 minutes. Metabolites were detected and quantified as area under the curve (AUC) based on retention time and accurate mass ( $\leq 3$  ppm) using the TraceFinder 3.1 (Thermo Scientific) software. Relative amounts of metabolites between various conditions, as well as percentage of labeling were calculated and corrected for naturally occurring <sup>13</sup>C abundance (Yuan et al., 2008; Moseley, 2010). For the heatmap depiction of the relative amounts of glycolytic intermediates, Z scores were calculated by subtracting the mean value across all samples, then dividing over standard deviation (SD). When feeder-supported and feeder-free primed hESCs were compared, a plate of irradiated MEFs without hESCs was also labeled with 1,2-<sup>13</sup>C-glucose, and traced the incorporation of <sup>13</sup>C into downstream glucose metabolites using LC-MS, to control for the presence of feeder cells in the FS conditions (Figure S4A-D, and Fan et al., 2014; Yuan et al., 2008).

### **Immunoblot Assays**

For preparing whole cell lysates, cells were lysed in M-PER Mammalian Protein Extraction Reagent (Thermo) with 20 mM NaF, 1 mM Na<sub>3</sub>VO<sub>4</sub>, 4 µg/ml aprotinin, 4 µg/ml leupeptin, 4 µg/ml pepstatin, and 1 mM DTT. Nuclear and cytoplasmic fractions were prepared using the following protocol: Buffer A, containing 10 mM HEPES (pH 7.9), 10 mM KCl, 0.1 mM EDTA, 0.4% NP40, 20 mM NaF, 1 mM Na<sub>3</sub>VO<sub>4</sub>, 4 µg/ml aprotinin, 4 µg/ml leupeptin, 4 µg/ml pepstatin, and 1 mM DTT, was used to extract cytoplasmic proteins; Nuclear pellet was resuspended in Buffer B, which contains 20 mM

HEPES (pH 7.9), 400 mM NaCl, 1mM EDTA, 10% glycerol, 20 mM NaF, 1 mM Na<sub>3</sub>VO<sub>4</sub>, 4 µg/ml aprotinin, 4 µg/ml leupeptin, 4 µg/ml pepstatin, and 1 mM DTT, and placed on vortex at 4 °C for 2 hours to extract nuclear proteins. Western blot analysis was carried out according to standard methods. Protein concentrations of cell extracts were determined by using the Protein Assay reagent (Bio-Rad). The following commercial antibodies were used as probes: C-MYC, N-MYC, OCT4A, TBP (Cell Signaling), β-Tubulin (Sigma), MCT1, and GAPDH (Abcam).

### **RNA-Seq**

Feeder-supported UCLA1 primed and naive hESCs were cultured in a 6-well dish. Primed hESCs were harvested with 1mg/ml Collagenase IV (Life Technologies) for 8min at 37 °C, or until the edges of colonies lifted off slightly. Colonies were collected in hESM followed by sequential sedimentation steps to deplete feeder cells. Colonies were then washed once in PBS and collected in 1ml Trizol (Invitrogen). Naive hESCs were feeder depleted by treating the cells with Accutase and passing the cells through a 40-µm mesh. Under these conditions feeder cells do not separate into single cells and therefore do not pass through the filter. Cells were collected in 1 ml Trizol after a PBS wash. Total RNA was isolated by phenol chloroform extraction and purified by RNeasy Mini Kit (Qiagen). The TruSeq Stranded mRNA Library Prep Kit (Illumina) was used to prepare mRNA libraries following manufacturer's instructions. The libraries were run on 2% SeaPlaque Agarose gel (Lonza) to remove primer contaminants, and purified using MinElute Gel Extraction Kit (Qiagen). Final library amounts were quantified by Qubit dsDNA HS Assay (Invitrogen) and sequenced on Illumina HiSeq 2500 instrument at the UCLA High-Throughput Sequencing Facility. Reads were mapped to hg19 assembly of

the human genome using the TopHat read-mapping algorithm (Trapnell et al., 2009), and gene expression levels were calculated as RPKM values (Mortazavi et al., 2008).

### **Microarray and Enrichment Analysis**

Total RNA was isolated by using the Absolutely RNA kit (Stratagene) and reverse-transcribed with the SuperScript III First-Strand Synthesis System (Invitrogen) with oligo dT primers. Whole-genome expression analysis was performed with the HG-U133 plus 2 array (Affymetrix) at the UCLA Clinical Microarray Core.

Gene Set Enrichment Analysis (Subramanian et al., 2005) was performed using the Molecular Signatures Database (MSigDB) C2 collection (version 5.0) of canonical signaling pathways, cellular processes, chemical and genetic perturbations, and human disease states. For GSEA on primed hESCs with AZD3965 or DMSO treatment, readings of probe sets were first RMA normalized, and then collapsed according to the probes with maximum expression values into gene symbols, which were then ranked according to the log<sub>10</sub> p value from paired t-test between AZD3965 and DMSO groups in three hESC lines: H1, H9, and HSF1. Pre-ranked GSEA was also conducted on naive and primed UCLA1 hESCs.

For human preimplantation datasets, each data was analyzed separately. The mRNA microarray dataset by Vassena et al., 2011 (GEO accession: GSE29397), was processed using Bioconductor package in R, normalized using the RMA method, and then imported to GSEA. The single-cell RNA-Seq dataset by Yan et al., 2013 (GEO accession: GSE36552) contained the gene expression levels presented as RPKM values, based on which the log fold changes (base 2) were calculated and ranked to generate an ordered gene list for Pre-ranked GSEA.

For the enriched MYC-regulated gene sets identified by GSEA, MENSSEN\_MYC\_TARGETS was first reported by Menssen et al. (Menssen and Hermeking, 2002), SCHLOSSER\_MYC\_TARGETS\_REPRESSED\_BY\_SERUM was based on published data by Schlosser et al. (Schlosser et al., 2005), and DANG\_MYC\_TARGETS\_UP was reported by Zeller et al. (Zeller et al., 2003). Details about each gene set can also be found at <http://software.broadinstitute.org/gsea/msigdb/>. A web-based application GOrilla (Eden et al., 2009) was used to identify enriched Gene Ontology (Ashburner et al., 2000) terms in a ranked list of all genes according to the differential expression in AZD3965 versus DMSO-treated H1, H9, and HSF1 hESCs.

### **Cell Proliferation**

Cells were seeded in triplicates in 6-well plates, and cell counts were obtained using a Coulter particle analyzer 5 days after seeding.

## SUPPLEMENTAL REFERENCES

- Ashburner, M., Ball, C.A., Blake, J.A., Botstein, D., Butler, H., Cherry, J.M., Davis, A.P., Dolinski, K., Dwight, S.S., Eppig, J.T., et al. (2000). Gene Ontology: tool for the unification of biology. *Nat. Genet.* *25*, 25–29.
- Eden, E., Navon, R., Steinfeld, I., Lipson, D., and Yakhini, Z. (2009). GOrilla: a tool for discovery and visualization of enriched GO terms in ranked gene lists. *BMC Bioinformatics* *10*, 48.
- Fan, J., Ye, J., Kamphorst, J.J., Shlomi, T., Thompson, C.B., and Rabinowitz, J.D. (2014). Quantitative flux analysis reveals folate-dependent NADPH production. *Nature* *510*, 298–302.
- Menssen, A., and Hermeking, H. (2002). Characterization of the c-MYC-regulated transcriptome by SAGE: Identification and analysis of c-MYC target genes. *Proc. Natl. Acad. Sci.* *99*, 6274–6279.
- Mortazavi, A., Williams, B.A., McCue, K., Schaeffer, L., and Wold, B. (2008). Mapping and quantifying mammalian transcriptomes by RNA-Seq. *Nat. Methods* *5*, 621–628.
- Moseley, H.N. (2010). Correcting for the effects of natural abundance in stable isotope resolved metabolomics experiments involving ultra-high resolution mass spectrometry. *BMC Bioinformatics* *11*, 139.
- Schlosser, I., Hölzel, M., Hoffmann, R., Burtscher, H., Kohlhuber, F., Schuhmacher, M., Chapman, R., Weidle, U.H., and Eick, D. (2005). Dissection of transcriptional programmes in response to serum and c-Myc in a human B-cell line. *Oncogene* *24*, 520–524.
- Subramanian, A., Tamayo, P., Mootha, V.K., Mukherjee, S., Ebert, B.L., Gillette, M.A., Paulovich, A., Pomeroy, S.L., Golub, T.R., Lander, E.S., et al. (2005). Gene set enrichment analysis: A knowledge-based approach for interpreting genome-wide expression profiles. *Proc. Natl. Acad. Sci.* *102*, 15545–15550.
- Takashima, Y., Guo, G., Loos, R., Nichols, J., Ficuz, G., Krueger, F., Oxley, D., Santos, F., Clarke, J., Mansfield, W., et al. (2014). Resetting Transcription Factor Control Circuitry toward Ground-State Pluripotency in Human. *Cell* *158*, 1254–1269.
- Theunissen, T.W., Powell, B.E., Wang, H., Mitalipova, M., Faddah, D.A., Reddy, J., Fan, Z.P., Maetzel, D., Ganz, K., Shi, L., et al. (2014). Systematic Identification of Culture Conditions for Induction and Maintenance of Naive Human Pluripotency. *Cell Stem Cell* *15*, 471–487.
- Trapnell, C., Pachter, L., and Salzberg, S.L. (2009). TopHat: discovering splice junctions with RNA-Seq. *Bioinformatics* *25*, 1105–1111.

Vassena, R., Boué, S., González-Roca, E., Aran, B., Auer, H., Veiga, A., and Belmonte, J.C.I. (2011). Waves of early transcriptional activation and pluripotency program initiation during human preimplantation development. *Development* *138*, 3699–3709.

Yan, L., Yang, M., Guo, H., Yang, L., Wu, J., Li, R., Liu, P., Lian, Y., Zheng, X., Yan, J., et al. (2013). Single-cell RNA-Seq profiling of human preimplantation embryos and embryonic stem cells. *Nat. Struct. Mol. Biol.* *20*, 1131–1139.

Yuan, J., Bennett, B.D., and Rabinowitz, J.D. (2008). Kinetic flux profiling for quantitation of cellular metabolic fluxes. *Nat. Protoc.* *3*, 1328–1340.

Zeller, K.I., Jegga, A.G., Aronow, B.J., O'Donnell, K.A., and Dang, C.V. (2003). An integrated database of genes responsive to the Myc oncogenic transcription factor: identification of direct genomic targets. *Genome Biol.* *4*, R69.
